# Supplementary material for: Effects of End-Terminal Capping on Transthyretin (105–115) Amyloid Protofibrils Using Steered Molecular Dynamics
Source: Hindawi journal article supplement (doi:10.1155/2016/1863065), 2016-01-01
Supplement: f1 [file 1863065.f1.docx]

**Supporting Information**

Figure S1. Electrostatic energy variation of uncapped and capped TTR amyloid protofibrils from beginning of simulation to first peak force event near 1 ns. (a) Time-electrostatic energy graph when 0.001 Å/ps constant velocity pulling applied. Green color represents the capped model, while pink color expresses the uncapped model. (b) Time-electrostatic energy graph when 0.005 Å/ps constant velocity pulling applied. Blue color represents the capped model, whereas yellow color expresses the uncapped model. (c) Released amount of electrostatic energy of uncapped and capped TTR amyloid protofibrils.
